# Supplementary material
Source: publisher site journal article supplement (https://www.dovepress.com/article/462694)
Supplement: Supplementary file 1 [file get_supplementary_file.php]

Supplementary Table 1.

Skin prick tests results of all tested allergens, irrespective of the number of tests performed.

| ALL RESULTS | % positivity | Sum (+) SPT | | Total of tests | |
| --- | --- | --- | --- | --- | --- |
| Dermatophagoides pteronyssinus | 61% | 1001 | | 1642 | |
| Dermatophagoides spp. | 59% | 807 | | 1373 | |
| Dermatophagoides farinae | 58% | 956 | | 1642 | |
| Anthoxanthum odoratum | 34% | 86 | | 250 | |
| Fraxinus | 29% | 848 | | 2912 | |
| Cynodon dactylon | 27% | 794 | | 2913 | |
| Bromus | 25% | 76 | | 300 | |
| Cat | 25% | 727 | | 2915 | |
| Paspallum notatum | 25% | 61 | | 248 | |
| Lolium perenne | 24% | 554 | | 2291 | |
| Quercus | 23% | 609 | | 2613 | |
| Cockroach (German or American) | 22% | 564 | | 2566 | |
| Blomia tropicalis | 21% | 319 | | 1521 | |
| Phleum pratense | 21% | 538 | | 2588 | |
| Taxodium distichum | 20% | 30 | | 148 | |
| Tritticum vulgare (wheat pollen) | 18% | 22 | | 123 | |
| Atriplex | 17% | 203 | | 1162 | |
| Poa pratensis | 17% | 125 | | 716 | |
| Dog | 17% | 502 | | 2915 | |
| Olea | 16% | 298 | | 1812 | |
| Ambrosia | 16% | 459 | | 2911 | |
| Zea mays | 16% | 192 | | 1222 | |
| Festuca | 16% | 35 | | 223 | |
| Amaranthus | 15% | 356 | | 2361 | |
| Prosopis | 15% | 364 | | 2463 | |
| Fusarium | 14% | 38 | | 276 | |
| Cladosporium h | 14% | 162 | | 1200 | |
| Chenopodium | 13% | 325 | | 2413 | |
| Alder | 13% | 270 | | 2011 | |
| Holcus halep | 13% | 249 | | 1863 | |
| Birch | 12% | 186 | | 1518 | |
| Salsola | 12% | 293 | | 2411 | |
| Cedro | 12% | 42 | | 346 | |
| Candida | 12% | 136 | | 1152 | |
| Cupressus | 12% | 295 | | 2510 | |
| Helianthus | 11% | 209 | | 1820 | |
| Alternaria | 11% | 305 | | 2716 | |
| Periplaneta | 11% | 67 | | 598 | |
| Artemisa | 11% | 305 | | 2811 | |
| Sorghum | 11% | 111 | | 1024 | |
| Rumex spp | 10% | 219 | | 2087 | |
| Plantago | 9% | | 169 | | 1817 |
| Schinus molle PIRUL | 9% | | 211 | | 2312 |
| Queen palm | 9% | | 9 | | 99 |
| Junglans rupestris | 9% | | 83 | | 915 |
| Rizopus | 9% | | 42 | | 476 |
| Ligustrum vulgare TRUENO | 9% | | 150 | | 1712 |
| Pinus pseudostrobus PINO BLANCO | 8% | | 152 | | 1822 |
| Maple (Box Elder) | 8% | | 8 | | 100 |
| Cosmos | 8% | | 34 | | 426 |
| Avena | 8% | | 20 | | 251 |
| Morus | 8% | | 30 | | 396 |
| Acacia | 8% | | 102 | | 1350 |
| Taraxacum | 7% | | 108 | | 1462 |
| Eucalyptus | 7% | | 137 | | 1896 |
| Platanus occidentalis | 7% | | 50 | | 695 |
| Populos | 7% | | 147 | | 2072 |
| Mezcla plumas AVES | 7% | | 96 | | 1369 |
| Franseria | 7% | | 14 | | 201 |
| Juniperus | 7% | | 63 | | 921 |
| Liquidambar | 7% | | 41 | | 600 |
| Sicomoro | 7% | | 13 | | 192 |
| Aspergilus fumigatus | 6% | | 146 | | 2517 |
| Mouse | 6% | | 11 | | 200 |
| Agrostis | 5% | | 38 | | 697 |
| Casuarina equisetifolia PINO AUSTRALIANO | 5% | | 37 | | 741 |
| Horse | 5% | | 35 | | 754 |
| Parietaria | 5% | | 16 | | 350 |
| Ulmus | 4% | | 18 | | 424 |
| Culex pipians | 4% | | 18 | | 473 |
| Penicillum notatum | 4% | | 31 | | 824 |
| Hormodendrum | 3% | | 10 | | 299 |
| Curvularia | 3% | | 3 | | 101 |
| Mosquito | 3% | | 17 | | 576 |
| Xanthium | 3% | | 10 | | 400 |
| Salix | 2% | | 18 | | 735 |
| Helmintosporium | 2% | | 7 | | 401 |
| Cattle | 1% | | 3 | | 296 |
| Rabbit | 1% | | 3 | | 401 |
| Bumbble bee | 1% | | 1 | | 200 |
| Fly | 0% | | 0 | | 300 |
| Goat | 0% | | 0 | | 201 |

Supplementary table 2

Changes in skin prick test positivity throughout Mexico during 2009 (N=958) as compared to SPT positivity during 2022-2023 (N=2915).

|  | 2009  % (+) | 2023  % (+) | 2009 | | | 2023 | | | OR | 95% CI | *p* |
| --- | --- | --- | --- | --- | --- | --- | --- | --- | --- | --- | --- |
| SPT(+) | SPT(-) | N | SPT(+) | SPT(-) | N |
| Der p | 55% | 62% | 523 | 435 | 958 | 1001 | 641 | 1642 | 1.30 | 1.11-1.53 | <.01 |
| Der f | 44% | 61% | 421 | 537 | 958 | 956 | 686 | 1642 | 1.78 | 1.52-2.09 | <.0001 |
| Ash (*Fraxinus excelsior)* | 23% | 30% | 218 | 740 | 958 | 848 | 2064 | 2912 | 1.39 | 1.17-1.65 | <.001 |
| Bermuda grass (*Cynodon dactylon*) | 23% | 27% | 219 | 739 | 958 | 794 | 2119 | 2913 | 1.26 | 1.06-1.50 | <.01 |
| Ryegrass (*Lolium perenne*) | 14% | 25% | 135 | 823 | 958 | 554 | 1737 | 2291 | 1.94 | 1.58-2.39 | <.0001 |
| Cat | 18% | 25% | 173 | 785 | 958 | 727 | 2188 | 2915 | 1.50 | 1.25-1.81 | <.0001 |
| Oak (*Quercus robur*) | 19% | 24% | 179 | 779 | 958 | 609 | 2004 | 2613 | 1.32 | 1.10-1.59 | <.01 |
| Cockroach | 19% | 22% | 184 | 774 | 958 | 564 | 2002 | 2566 | NS |  | NS |
| Timothy (*Phleum pratensis*) | 16% | 22% | 149 | 809 | 958 | 538 | 2050 | 2588 | 1.42 | 1.16-1.73 | <.001 |
| *Blomia* | 36% | 21% | 343 | 615 | 958 | 319 | 1202 | 1521 | 0.48 | 0.40-0.57 | <.0001 |
| Kentucky bluegrass (*Poa pratensis*) | 17% | 20% | 162 | 796 | 958 | 125 | 591 | 716 | NS |  | NS |
| Orach (*Atriplex bracteosa*) | 7% | 19% | 71 | 887 | 958 | 203 | 959 | 1162 | 2.65 | 1.99-3.52 | <.0001 |
| Dog | 9% | 17% | 88 | 870 | 958 | 502 | 2413 | 2915 | 2.05 | 1.62-2.61 | <.0001 |

% (+) = percentage of positive tests; CI = confidence interval; Der f = *Dermatophagoides farinae;* Der p = *Dermatophagoides pteronyssinus*; OR = odds ratio; SPT = skin prick test; Total (+) = total of positive tests.

Supplementary Table 3.

Skin prick test positivity to tree pollens in patients with respiratory allergy living in humid versus dry zones throughout Mexico during 2022-2023 (N=2915). Percentages, absolute numbers and differences between humid and dry zones.

| **Trees**  **(species)** | Humid region  % (+) | Dry region % (+) | Humid regions | | Dry regions | | OR | 95% CI | *p* |
| --- | --- | --- | --- | --- | --- | --- | --- | --- | --- |
| Total (+) | Total (-) | Total (+) | Total (-) |
| Ash | 32.3% | 22.0% | 652 | 1369 | 196 | 695 | 1.69 | 1.41-2.03 | <.0001 |
| Oak | 27.5% | 15.2% | 473 | 1247 | 136 | 757 | 2.11 | 1.71-2.61 | <.0001 |
| Olive | 21.2% | 8.8% | 237 | 883 | 61 | 631 | 2.78 | 2.06-3.75 | <.0001 |
| Alder | 13.5% | 13.3% | 191 | 1227 | 79 | 514 | NS |  |  |
| Cypress | 12.3% | 10.8% | 199 | 1418 | 96 | 797 | NS |  |  |
| Ligustrum | 9.8% | 3.8% | 139 | 1280 | 11 | 282 | 2.78 | 1.49-5.21 | <.005 |
| Acacia | 9.1% | 5.7% | 68 | 681 | 34 | 567 | 1.66 | 1.09-2.55 | <.05 |
| Liquidambar | 8.2% | 0.0% | 41 | 458 | 0 | 101 | Infinity | NaN-Infinity | <.01 |
| Casuarina | 7.3% | 1.4% | 33 | 416 | 4 | 288 | 5.71 | 2.00-16.30 | <.001 |
| Elm | 6.8% | 7.8% | 100 | 1371 | 47 | 554 | NS |  | NS |
| Platanus | 6.1% | 8.0% | 18 | 277 | 32 | 368 | NS |  | NS |
| Juglans | 5.6% | 11.0% | 18 | 304 | 65 | 528 | 0.48 | 0.28-0.83 | <.01 |
| Pine | 7.0% | 11.0% | 86 | 1135 | 66 | 535 | 0.61 | 0.44-0.86 | <.01 |
| Willow | 8.3% | 11.6% | 142 | 1577 | 69 | 524 | 0.68 | 0.50-0.93 | <.05 |
| Juniperus | 6.4% | 12.0% | 27 | 392 | 36 | 265 | 0.51 | 0.30-0.86 | <.01 |
| Eucalyptus | 5.2% | 12.8% | 73 | 1322 | 64 | 437 | 0.38 | 0.27-0.54 | <.0001 |
| Birch | 11.5% | 14.5% | 129 | 997 | 57 | 335 | NS |  | NS |
| Mesquite | 13.0% | 17.7% | 205 | 1366 | 158 | 734 | 0.70 | 0.56-0.87 | <.01 |

% (+) = percentage of positive tests; Total (+) = total of positive tests; CI = confidence interval; OR = odds ratio.

Supplementary Table 4. Skin prick test positivity to grass pollens in patients with respiratory allergy living in humid versus dry zones throughout Mexico during 2022-2023 (N=2915). Percentages, absolute numbers and differences between humid and dry zones.

| **Grasses**  **(species)** | Humid region  % (+) | Dry region % (+) | Humid regions | | Dry regions | | OR | 95% CI | *p* |
| --- | --- | --- | --- | --- | --- | --- | --- | --- | --- |
| Total (+) | Total (-) | Total (+) | Total (-) |
| Agrostis | 4.2% | 8.5% | 21 | 475 | 17 | 184 | 0.48 | 0.25-0.93 | <.05 |
| *Holcus halepensis* | 12.8% | 14.7% | 162 | 1108 | 87 | 506 | NS |  | NS |
| Sorghum | 6.9% | 17.0% | 43 | 580 | 68 | 333 | 0.36 | 0.24-0.54 | <.0001 |
| *Zea mays* | 14.2% | 20.3% | 131 | 790 | 61 | 240 | 0.65 | 0.47-0.91 | <.05 |
| *Poa pratensis* | 12.4% | 21.4% | 39 | 276 | 86 | 315 | 0.52 | 0.34-0.78 | <.01 |
| *Phleum pratense* | 18.2% | 25.6% | 309 | 1386 | 229 | 664 | 0.65 | 0.53-0.79 | <.0001 |
| Lolium | 23.1% | 26.7% | 369 | 1229 | 185 | 508 | NS |  | NS |
| *Cynodon dactylon* | 24.4% | 33.7% | 493 | 1528 | 301 | 591 | 0.63 | 0.53-0.75 | <.0001 |

% (+) = percentage of positive tests; Total (+) = total of positive tests; CI = confidence interval; OR = odds ratio.

Supplementary Table 5. Skin prick test positivity to weed pollens in patients with respiratory allergy living in humid versus dry zones throughout Mexico during 2022-2023 (N=2915). Percentages, absolute numbers and differences between humid and dry zones.

| **Weeds**  **(species)** | Humid region  % (+) | Dry region % (+) | Humid regions | | Dry regions | | OR | 95% CI | *p* |
| --- | --- | --- | --- | --- | --- | --- | --- | --- | --- |
| Total (+) | Total (-) | Total (+) | Total (-) |
| Ambrosia | 16.7% | 13.8% | 336 | 1682 | 123 | 770 | 1.25 | 1.00-1.56 | <.05 |
| Amaranthus | 15.5% | 14.2% | 243 | 1325 | 113 | 680 | NS |  | NS |
| Chenopodium | 14.7% | 10.5% | 252 | 1468 | 73 | 620 | 1.46 | 1.11-1.92 | <.01 |
| Helianthus | 12.9% | 4.3% | 196 | 1323 | 13 | 288 | 3.28 | 1.85-5.84 | <.0001 |
| Artemisia | 10.8% | 11.0% | 207 | 1711 | 98 | 795 | NS |  | NS |
| Rumex | 10.8% | 9.4% | 161 | 1333 | 56 | 537 | NS |  | NS |
| Taraxacum | 6.7% | 8.7% | 65 | 904 | 43 | 450 | NS |  | NS |
| Salsola | 9.0% | 18.7% | 145 | 1473 | 148 | 645 | 0.43 | 0.34-0.55 | <.0001 |
| Atriplex | 15.6% | 21.1% | 120 | 649 | 83 | 310 | 0.69 | 0.51-0.94 | <.05 |
| Plantago | 7.4% | 24.4% | 120 | 1496 | 49 | 152 | 0.25 | 0.17-0.36 | <.0001 |

% (+) = percentage of positive tests; Total (+) = total of positive tests; CI = confidence interval; OR = odds ratio.

Supplementary Table 6. Skin prick test positivity to perennial allergens in patients with respiratory allergy living in humid versus dry zones throughout Mexico during 2022-2023 (N=2915). Percentages, absolute numbers and differences between humid and dry zones.

| **Perennial allergens** | Humid región  % (+) | Dry región % (+) | Humid regions | | Dry regions | | OR | 95% CI | *p* |
| --- | --- | --- | --- | --- | --- | --- | --- | --- | --- |
| Total (+) | Total (-) | Total (+) | Total (-) |
| *Dermatophagoides pteronyssinus* | 68.3% | 54.4% | 785 | 364 | 268 | 225 | 1.81 | 1.46-2.25 | <.0001 |
| *Dermatophagoides farinae* | 66.1% | 49.9% | 759 | 390 | 246 | 247 | 1.95 | 1.58-2.42 | <.0001 |
| *Dermatophagoides* *spp* | 57.5% | 62.0% | 559 | 414 | 248 | 152 | NS |  |  |
| Cockroach | 26.1% | 12.8% | 463 | 1311 | 101 | 691 | 2.42 | 1.91-3.05 | <.0001 |
| *Blomia tropicalis* | 20.4% | 24.5% | 270 | 1051 | 49 | 151 | NS |  | NS |
| Cat | 25.1% | 24.6% | 507 | 1515 | 220 | 673 | NS |  | NS |
| Dog | 17.0% | 17.6% | 344 | 1678 | 157 | 736 | NS |  | NS |
| Horse | 6.1% | 0.5% | 34 | 519 | 1 | 200 | 13.10 | 1.78-96.36 | <.01 |
| Mosquito | 4.3% | 0.5% | 16 | 359 | 1 | 200 | 8.91 | 1.17-67.71 | <.05 |
| Bird feathers | 4.0% | 12.2% | 35 | 833 | 61 | 440 | 0.30 | 0.20-0.47 | <.0001 |

% (+) = percentage of positive tests; Total (+) = total of positive tests; CI = confidence interval; OR = odds ratio.

Supplementary Table 7. Skin prick test positivity molds in patients with respiratory allergy living in humid versus dry zones throughout Mexico during 2022-2023 (N=2915). Percentages, absolute numbers and differences between humid and dry zones.

| **Mold allergens (species)** | Humid region  % (+) | Dry region % (+) | Humid regions | | Dry regions | | OR | 95% CI | *p* |
| --- | --- | --- | --- | --- | --- | --- | --- | --- | --- |
| Total (+) | Total (-) | Total (+) | Total (-) |
| Candida spp. | 15.0% | 2.7% | 128 | 723 | 8 | 293 | 6.48 | 3.13-13.42 | <.0001 |
| *Alternaria alternata* | 12.6% | 8.0% | 242 | 1682 | 63 | 729 | 1.66 | 1.25-2.23 | <.001 |
| *Aspergillus fumigatus* | 6.4% | 4.7% | 104 | 1520 | 42 | 851 | NS |  | NS |
| *Penicillium notatum* | 1.9% | 5.0% | 6 | 317 | 25 | 476 | 0.36 | 0.15-0.89 | <.05 |
| *Cladosporium herbarum* | 13.4% | 14.0% | 134 | 866 | 28 | 172 | NS |  |  |

% (+) = percentage of positive tests; Total (+) = total of positive tests; CI = confidence interval; OR = odds ratio.
